# Supplementary material
Source: PubMed Central journal article supplement (PMC6432922)
Supplement: NIHMS1015808-supplement-11.pdf [file NIHMS1015808-supplement-11.pdf]

- 513 38. Y. S. Kim *et al.*, Prevalence of autism spectrum disorders in a total population  
514 sample. *Am J Psychiatry*. **168**, 904–912 (2011).
- 515 39. Q. Wei *et al.*, A Bayesian framework for de novo mutation calling in parents-  
516 offspring trios. *Bioinformatics*. **31**, 1375–1381 (2015).
- 517 40. H. Zhao *et al.*, CrossMap: A versatile tool for coordinate conversion between  
518 genome assemblies. *Bioinformatics*. **30**, 1006–1007 (2014).
- 519 41. A. Untergasser *et al.*, Primer3—new capabilities and interfaces. *Nucleic Acids*  
520 *Res.* **40**, e115–e115 (2012).
- 521 42. J. A. Miller *et al.*, Transcriptional landscape of the prenatal human brain. *Nature*.  
522 **508**, 199–206 (2014).
- 523 43. C. F. Wright *et al.*, Genetic diagnosis of developmental disorders in the DDD  
524 study: a scalable analysis of genome-wide research data. *Lancet*. **385**, 1305–  
525 1314 (2015).
- 526 44. A. Bayes *et al.*, Characterization of the proteome, diseases and evolution of the  
527 human postsynaptic density. *Nat Neurosci*. **14**, 19–21 (2011).
- 528 45. C. E. Grant, T. L. Bailey, W. S. Noble, FIMO: Scanning for occurrences of a given  
529 motif. *Bioinformatics*. **27**, 1017–1018 (2011).
- 530 46. S. Purcell *et al.*, PLINK: A Tool Set for Whole-Genome Association and  
531 Population-Based Linkage Analyses. *Am. J. Hum. Genet.* **81**, 559–575 (2007).
- 532 47. J. Friedman, T. Hastie, R. Tibshirani, Regularization Paths for Generalized Linear  
533 Models via Coordinate Descent. *J. Stat. Softw.* **33** (2010),  
534 doi:10.18637/jss.v033.i01.
- 535 48. R. Tibshirani, Regression Selection and Shrinkage via the Lasso. *J. R. Stat. Soc.*  
536 *B.* **58** (1996), pp. 267–288.
- 537 49. J. J. Michaelson *et al.*, Whole-Genome Sequencing in Autism Identifies Hot Spots  
538 for De Novo Germline Mutation. *Cell*. **151**, 1431–1442 (2012).
- 539 50. D. F. Conrad *et al.*, Variation in genome-wide mutation rates within and between  
540 human families. *Nat Genet.* **43**, 712–714 (2011).
- 541 51. A. Kong *et al.*, Rate of de novo mutations and the importance of father’s age to  
542 disease risk. *Nature*. **488**, 471–475 (2012).
- 543 52. R. Rahbari *et al.*, Timing, rates and spectra of human germline mutation. *Nat.*  
544 *Genet.* **48**, 126–133 (2015).
- 545
